## RESEARCH ARTICLE

# Genomic epidemiology of *Campylobacter jejuni* associated with asymptomatic pediatric infection in the Peruvian Amazon

Ben Pascoe<sup>1,2\*</sup>, Francesca Schiaffino<sup>3,4</sup>, Susan Murray<sup>5,6</sup>, Guillaume Méric<sup>1<sup>‡</sup>a,b</sup>, Sion C. Bayliss<sup>1</sup>, Matthew D. Hitchings<sup>5</sup>, Evangelos Mourkas<sup>1</sup>, Jessica K. Calland<sup>1</sup>, Rosa Burga<sup>7</sup>, Pablo Peñataro Yori<sup>8,9</sup>, Keith A. Jolley<sup>10</sup>, Kerry K. Cooper<sup>11</sup>, Craig T. Parker<sup>12</sup>, Maribel Paredes Olortegui<sup>9</sup>, Margaret N. Kosek<sup>8,9\*</sup>, Samuel K. Sheppard<sup>1,2,10</sup>

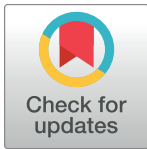

## OPEN ACCESS

**Citation:** Pascoe B, Schiaffino F, Murray S, Méric G, Bayliss SC, Hitchings MD, et al. (2020) Genomic epidemiology of *Campylobacter jejuni* associated with asymptomatic pediatric infection in the Peruvian Amazon. *PLoS Negl Trop Dis* 14(8): e0008533. <https://doi.org/10.1371/journal.pntd.0008533>

**Editor:** Benjamin L. Makepeace, University of Liverpool, UNITED KINGDOM

**Received:** April 20, 2020

**Accepted:** June 29, 2020

**Published:** August 10, 2020

**Copyright:** This is an open access article, free of all copyright, and may be freely reproduced, distributed, transmitted, modified, built upon, or otherwise used by anyone for any lawful purpose. The work is made available under the [Creative Commons CC0](https://creativecommons.org/licenses/by/4.0/) public domain dedication.

**Data Availability Statement:** Short read data are available on the NCBI SRA, associated with BioProject PRJNA350267 (<https://www.ncbi.nlm.nih.gov/bioproject/PRJNA350267>). Assembled genomes and supplementary material are available from FigShare: doi:10.6084/m9.figshare.10352375.

**Funding:** SKS is funded by the Medical Research Council (MR/L015080/1; <https://mrc.ukri.org/>) and Biotechnology and Biological Sciences Research

**1** The Milner Centre for Evolution, Department of Biology and Biochemistry, University of Bath, Bath, United Kingdom, **2** Faculty of Associated Medical Sciences, Chiang Mai University, Chiang Mai, Thailand, **3** Department of International Health, Johns Hopkins Bloomberg School of Public Health, Baltimore, Maryland, United States of America, **4** Faculty of Veterinary Medicine, Universidad Peruana Cayetano Heredia, Lima, Peru, **5** Swansea University Medical School, Swansea University, Singleton Park, Swansea, United Kingdom, **6** Department of Medical Biochemistry and Microbiology, Science for Life Laboratories, Uppsala University, Uppsala, Sweden, **7** Bacteriology Department, Naval Medical Research Unit-6 (NAMRU-6), Iquitos, Peru, **8** The Division of Infectious Diseases and International Health, University of Virginia, Charlottesville, Virginia, United States of America, **9** Asociacion Benefica Prisma, Loreto, Peru, **10** Department of Zoology, University of Oxford, South Parks Road, Oxford, United Kingdom, **11** School of Animal and Comparative Biomedical Sciences, University of Arizona, Tucson, Arizona, United States of America, **12** Produce Safety and Microbiology Research Unit, Agricultural Research Service, US Department of Agriculture, Albany, California, United States of America

<sup>‡</sup>a Current Address: Cambridge Baker Systems Genomics Initiative, Baker Heart and Diabetes Institute, Melbourne, Victoria, Australia

<sup>‡</sup>b Current Address: Department of Infectious Diseases, Central Clinical School, Monash University, Melbourne, Victoria, Australia

\* [b.pascoe@bath.ac.uk](mailto:b.pascoe@bath.ac.uk) (BP); [MNK2N@hscmail.mcc.virginia.edu](mailto:MNK2N@hscmail.mcc.virginia.edu) (MNK)

## Abstract

*Campylobacter* is the leading bacterial cause of gastroenteritis worldwide and its incidence is especially high in low- and middle-income countries (LMIC). Disease epidemiology in LMICs is different compared to high income countries like the USA or in Europe. Children in LMICs commonly have repeated and chronic infections even in the absence of symptoms, which can lead to deficits in early childhood development. In this study, we sequenced and characterized *C. jejuni* ( $n = 62$ ) from a longitudinal cohort study of children under the age of 5 with and without diarrheal symptoms, and contextualized them within a global *C. jejuni* genome collection. Epidemiological differences in disease presentation were reflected in the genomes, specifically by the absence of some of the most common global disease-causing lineages. As in many other countries, poultry-associated strains were likely a major source of human infection but almost half of local disease cases (15 of 31) were attributable to genotypes that are rare outside of Peru. Asymptomatic infection was not limited to a single (or few) human adapted lineages but resulted from phylogenetically divergent strains suggesting an important role for host factors in the cryptic epidemiology of campylobacteriosis in LMICs.

Council (BB/P504750/1; <https://bbsrc.ukri.org/>). Isolate sampling and collection was funded by the National Institute of Health (K01-TW05717; <https://www.nih.gov/>) and MK received further support from the Bill & Melinda Gates Foundation (OPP1066146; <https://www.gatesfoundation.org/>). The funders had no role in study design, data collection and analysis, decision to publish, or preparation of the manuscript.

**Competing interests:** The authors have declared that no competing interests exist.

## Author summary

*Campylobacter* is the leading bacterial cause of gastroenteritis worldwide and despite high incidence in low- and middle-income countries (LMICs), where infection can be fatal, culture based isolation is rare and the genotypes responsible for disease have not broadly been identified. The epidemiology of disease is different to that in high income countries, where sporadic infection associated with contaminated food consumption typically leads to acute gastroenteritis. In some LMICs infection is endemic among children and common asymptomatic carriage is associated with malnutrition, attenuated growth in early childhood, and poor cognitive and physical development. Here, we sequenced the genomes of isolates sampled from children in the Peruvian Amazon to investigate genotypes associated with varying disease severity and the source of infection. Among the common globally circulating genotypes and local genotypes rarely seen before, no single lineage was responsible for symptomatic or asymptomatic infection—suggesting an important role for host factors. However, consistent with other countries, poultry-associated strains were a likely major source of infection. This genomic surveillance approach, that integrates microbial ecology with population based studies in humans and animals, has considerable potential for describing cryptic epidemiology in LMICs and will inform work to improve infant health worldwide.

## Introduction

The World Health Organization ranks diarrheal disease as the second most common cause of mortality among children under five years of age in low- and middle-income countries (LMICs), accounting for 10.6 million annual deaths in this age group [1,2]. *Campylobacter* is the most common cause of bacterial gastroenteritis in Europe and the USA, with even higher incidence in LMICs (up to 85% of children infected before 12 months [3]). However, *Campylobacter* infection is largely overlooked in LMICs for several reasons. Infection is thought to be sporadic so outbreaks are seldom recorded. *Campylobacter* are also more difficult to grow in the laboratory than many common enteric pathogens, so it is often not cultured even when present. These factors conspire such that the people at the greatest risk are the least studied.

In high-income countries, human campylobacteriosis is readily diagnosed as a disease associated with consumption of contaminated food, especially poultry [4,5], but the extremely high incidence in LMICs suggests different epidemiology. High exposure rates [6,7] and apparent endemism among young children [8–10] are a major concern, particularly as frequent or chronic (re)infection is linked to significant morbidity, growth faltering, cognitive impairment, and even death [11,12]. However, there is also evidence of common asymptomatic carriage among children in LMICs [7], a phenomenon that is not well understood. International studies have begun to quantify the causes of enteric infection in children [13–16] but campylobacteriosis surveillance programs remain uncommon and the strains responsible for disease are seldom characterized in LMICs [11,17–23]. Understanding the true disease burden requires not only incidence data, but also knowledge of variation in disease symptoms and the genotypes associated with asymptomatic and severe infection.

DNA-sequence-based strain characterization, typically of isolates from developed countries, has revealed considerable diversity within the major disease-causing *Campylobacter* species (*C. jejuni* and *C. coli*). This has allowed identification of the genotypes, and in some cases genes, linked with variation in disease symptoms and the source of infecting strains. For

example, the identification of host-associated genetic variation [24] and the extent to which this segregates by host (host generalist and specialist genotypes) [25–27], means that human infection can be attributed to a specific reservoir source, when there is no human-to-human transmission [24,25,27–29]. Furthermore, in some cases it is possible to link particular genotypes to common disease sequelae [30–32] or severe infections [33–35], and identify locally [36–38] and globally distributed strains [39,40].

Among the most fundamental challenges in LMICs is to understand if disease severity and asymptomatic carriage are dictated by host factors, such as malnutrition [12], or the source and genotype of the infecting strain. In this study we address this as part of ongoing surveillance in Santa Clara, a semi-rural community near Iquitos in the Peruvian Amazon (Fig 1A). *C. jejuni* were isolated from individuals with varying disease severity, from no symptoms to severe infection, and the genomes were sequenced and contextualized within a global reference collection. Both locally and globally disseminated genotypes were isolated from Peruvian children with a range of disease symptoms. Comparative genomics of isolates from symptomatic and asymptomatic individuals identified signatures of local diversification but little evidence of genetic elements specifically responsible for severe disease. Household crowding, poor sanitation, consumption of contaminated water and cohabitation with animals remain potential risks for local transmission, but poultry were revealed as an important infection reservoir based on source attribution analysis. This study provides a basis for considering complex transmission networks in LMICs and highlights the role of globally transmitted *Campylobacter* lineages.

## Methods

### Sampling and cohort information

Samples were collected as part of a cohort study conducted near Iquitos, in the Peruvian Amazon, between 2002 and 2006. Subjects were recruited from Santa Clara and nearby communities, which is a rural area located 15 km southeast of the urban center of Iquitos. The predominant industry is small scale farming, extraction of forest goods (wood and palm thatch), fishing, brickmaking and transport of goods bound to Iquitos arriving to the port along the Nanay River. In this age-stratified sample set of 442 children aged 0–5 years [7,13–15,41,42], children were visited 3 times weekly to form a continuous symptom history of childhood illnesses. Stool samples were collected quarterly from all children and in cases in which diarrhea was detected (92.3% of episodes detected by surveillance had a sample collected; S1 Table). Children contributed samples throughout the duration they were involved in the study, contributing multiple samples if they experienced multiple diarrheal episodes.

Fecal samples were swabbed into Cary-Blair transport media, suspended in PBS, filtered through a 0.45 µm membrane and placed on a Columbia Blood Agar base (Oxoid) supplemented by 5% (v/v) defibrinated sheep blood for 30 min prior to removal and streaking of filtrate. The ethics committee of Asociacion Benefica PRISMA, the Regional Health Directorate of Loreto (DIRESA) and the Institutional Review Board of The Johns Hopkins Bloomberg School of Public Health approved the study protocol. Written consent was obtained from the legal guardian of all participants.

### Bacterial isolate genome sequencing

Genomic DNA was extracted from all *C. jejuni* isolates from a previous study [7] and sequenced using an Illumina MiSeq benchtop sequencer (California, USA). Nextera XT libraries (Illumina, California, USA) were prepared and short paired-end reads (250 bp) were assembled *de novo* using Velvet (version 1.2.08) [43] with VelvetOptimiser (version 2.2.4).

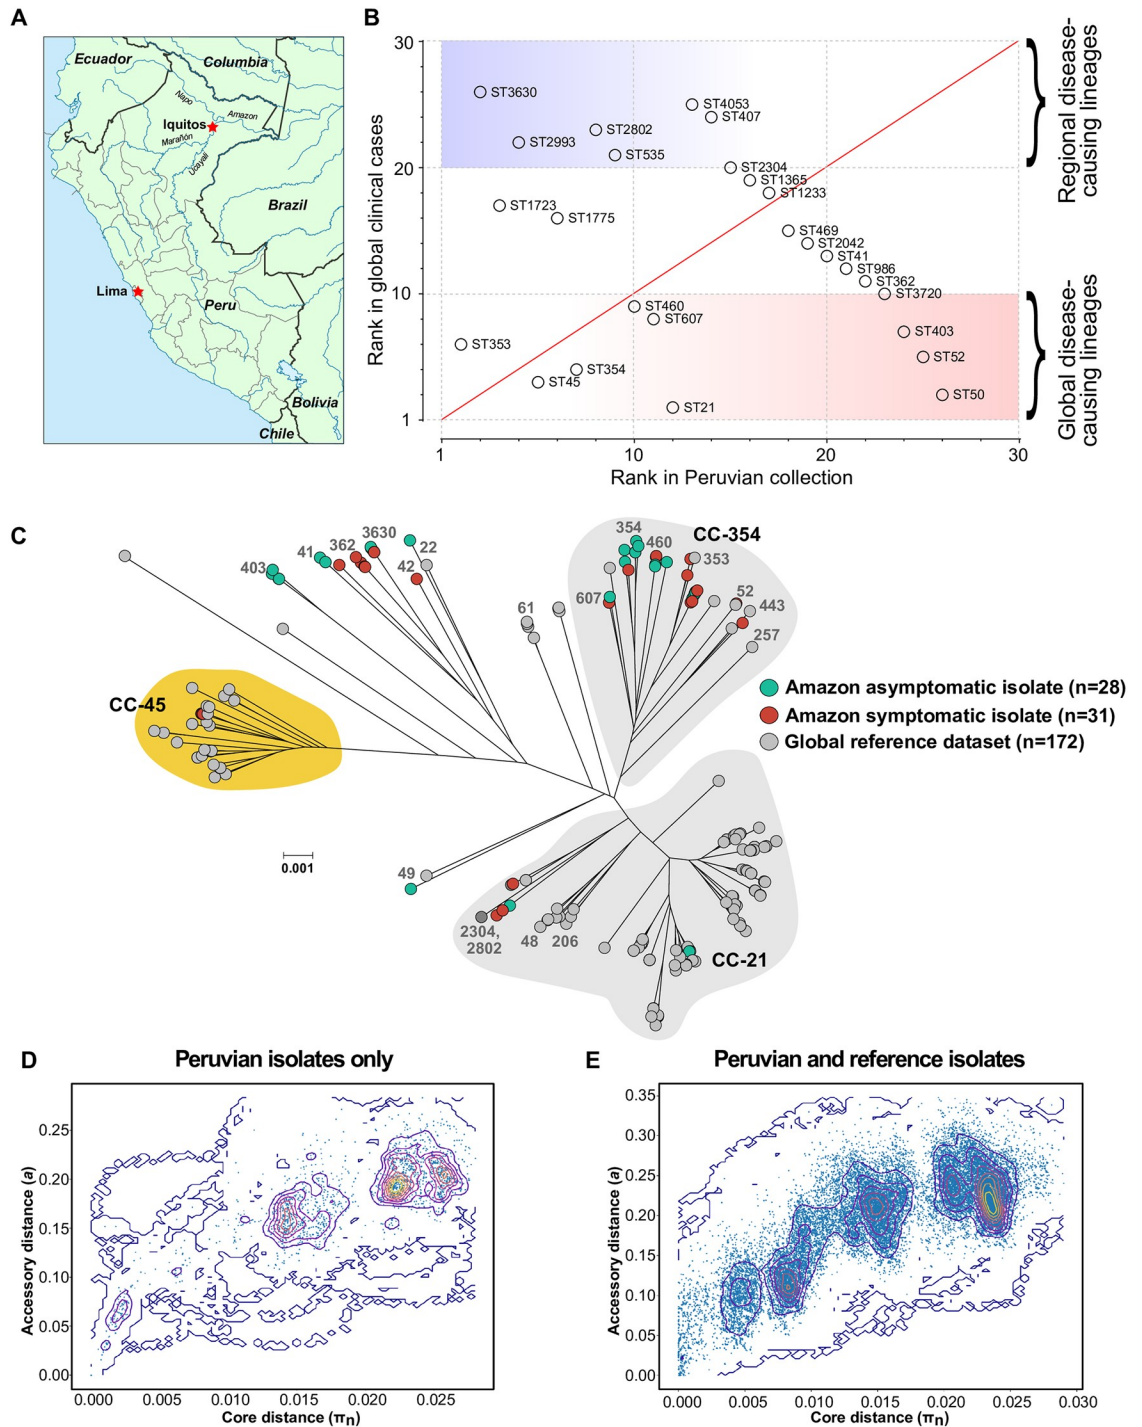

**Fig 1.** (A) Location of study site in Santa Clara, near Iquitos in Peru. (B) Sequence types (STs) of isolates collected from children in the Peruvian Amazon ranked according to the frequency in our local dataset and how often they have been sampled from human disease isolates (data from pubMLST; <https://pubmlst.org/>). (C) Population structure of *C. jejuni* isolates used in this study. All core (present in  $\geq 95\%$  of isolates) genes from the reference pan-genome list (2,348 genes) were used to build alignments of the Peruvian isolates ( $n = 62$ ) contextualized with 164 previously published genomes representing the known genetic diversity in *C. jejuni* ( $n = 234$ , alignment: 720,853 bp. A maximum-likelihood phylogeny was constructed with IQ-TREE, using a GTR model and ultrafast bootstrapping (1,000 bootstraps; version 1.6.8) [55,56]. Scale bar represents genetic distance of 0.001. Leaves from asymptomatic Peruvian isolates are colored green; symptomatic Peruvian isolates are red; and isolates from the reference dataset are grey. Common STs and clonal complexes (CC), based on four or more shared alleles in seven MLST housekeeping genes, are annotated [60]. Interactive visualization is available on Microreact [57]: <https://microreact.org/project/CampyPeruContext>. (D)



Pairwise core and accessory genome distances were compared using PopPunk for the Peruvian pediatric genomes only and (E) with the global reference dataset (version 1.1.4) [70].

<https://doi.org/10.1371/journal.pntd.0008533.g001>

Assemblies containing greater than 1,000 contigs were discarded. The average number of contiguous sequences (contigs) in 62 *C. jejuni* genomes was 262 (range: 53–701) for an average total assembled sequence size of 1.55 Mbp (range: 1.37–1.70). The average N50 contig length (L50) was 14,577 (range: 3,794–55,912) and the average GC content was 30.8% (range: 30.5–31.6). Short read data are available on the NCBI SRA, associated with BioProject PRJNA350267. Assembled genomes and supplementary material are available from FigShare ([10.6084/m9.figshare.10352375](https://doi.org/10.6084/m9.figshare.10352375); individual accession numbers and assembled genome statistics in [S2 Table](#)). Isolates were compared to a published global reference dataset representing the genetic diversity of the species (n = 164 isolates from eight countries and three continents) ([S3 Table](#)) [26,36,44–47].

### Diarrheal disease severity

As part of the ongoing surveillance efforts, a questionnaire was completed three times per week to record diarrheal symptoms for all members of the cohort [7,13,14], generating a continual illness record for the surveillance period. *Campylobacter* isolated from patients that did not display any symptoms two days before or after collection of the stool sample were considered asymptomatic. Diarrhea was defined by three or more semi-liquid stools reported over a 24-hour period, with episodes separated by at least three symptom-free days. Diarrheal severity symptoms were catalogued and details recorded of any symptom, including the number of diarrheal episodes, hematochezia (blood in the stool), fever, incidence of vomiting and anorexia ([S1 Table](#)) [48].

### Core genome genealogies

A reference pan-genome file was constructed by combining open reading frames identified by RAST [49,50] in all the Peruvian isolates and the *C. jejuni* NCTC 11168 reference strain to maintain locus nomenclature [51]. Gene orthologues ( $\geq 70\%$  sequence similarity) were identified and duplicates removed (size: 2,045,739 bp; [S1 File](#)). Two alignment files were constructed from concatenated gene sequences of all core genes (found in  $\geq 95\%$  isolates) from the reference pan-genome list using MAFFT [52] on a gene-by-gene basis [53,54]: one for the Peruvian isolates only (size: 772,794 bp; [S2 File](#)); and a second alignment containing the Peruvian isolates plus the global reference collection (size: 720,853 bp; [S3 File](#)). Maximum-likelihood phylogenies were constructed in IQ-TREE (version 1.6.8) using the GTR+F+I+G4 substitution model and ultra-fast bootstrapping (1,000 bootstraps) [55,56]; and visualized on Microreact [57]: Peru only (<https://microreact.org/project/CampyPeruOnly>); Peru and the global reference dataset (<https://microreact.org/project/CampyPeruContext>).

### Molecular typing and diversity estimates

Isolate genomes were archived in BIGSdb and MLST sequence types (STs) derived through BLAST comparison with the pubMLST database [58–60]. Capsule polysaccharide (CPS) and lipooligosaccharide (LOS) locus types of each *C. jejuni* isolate were characterized from their raw sequence data: short read sequences were mapped to known capsule and LOS locus types using BLAST as previously described [61,62]. Simpson's index of diversity (with 95% confidence limits) was calculated for sequence types in the Peruvian and global reference datasets

using the equation:

$$D = 1 - \frac{\sum n(n-1)}{N(N-1)}$$

Where  $n$  is the number of isolates of each sequence type and  $N$  is the total number of isolates [55,63].

### Accessory genome characterization

The pan-genome of all Peruvian isolates contained 2,348 genes, of which 1,321 genes were shared by all isolates ( $\geq 95\%$ ) and defined as the core genome (S4 Table). The accessory genomes of each isolate was characterized, including detection of antimicrobial resistance genes, putative virulence factors and known plasmid genes using ABRICATE (version 0.9.8) and the CARD, NCBI, ResFinder, VfDB and PlasmidFinder databases (10<sup>th</sup> September, 2019 update; S5 Table and summarized in S6 Table) [64–69]. Pairwise core and accessory genome distances were compared using PopPUNK (version 1.1.4), which uses pairwise nucleotide k-mer comparisons to distinguish shared sequence and gene content to identify divergence of the accessory genome in relation to the core genome. A two-component Gaussian mixture model was used to construct a network to define clusters (Components: 43; Density: 0.1059; Transitivity: 0.8716; Score: 0.7793) [70].

### Source attribution

Sequence type (ST) and clonal complex (CC) ecological association were assigned based on previous publication and the relative abundance of STs among different host/sources within pubMLST (S7 Table) [26,58]. This was supported by probabilistic assignment of the source host of infection using Structure v2.3.4, a Bayesian model-based clustering method designed to infer population structure and assign individuals to populations using multilocus genotype data [27,28,36,71,72]. In the absence of contemporaneous reservoir samples from Peru, we used a random selection of MLST profiles from pubMLST ( $n = 1,229$ ;  $\sim 300$  isolates per putative source reservoir; S8 Table). A global genotype collection can be used for reservoir comparison as it is known that host-associated genetic variation transcends phylogeographic signatures [27]. MLST profiles of known provenance were used to train the model (from 13 countries—98% European; collected from 1996–2018). Isolates were grouped by source reservoir: chicken (denoting chicken carcass, meat or broiler environments), ruminant (cattle, sheep or goat feces, offal, or meat), wild birds (including starlings, ducks and geese) or other animal (as listed in pubMLST).

Self-assignment of a random subset of the comparison data set was conducted by removing a third of the isolates from each candidate population ( $n = 388$ ). Structure was run for 10,000 iterations following a burn-in period of 10,000 iterations using the no admixture model to assign individuals to putative populations. The assignment probability for each source was calculated for each isolate individually and isolates attributed to the putative origin population with the greatest attribution probability. We report an average self-assignment score of 61% (range 56.5–63.6%) following five independent estimations, consistent with other studies [27,28,73,74].

## Results

### Globally circulating disease genotypes are found in the Peruvian Amazon

We sequenced and characterized a collection of *C. jejuni* isolates ( $n = 62$ ) from a longitudinal cohort study of children under the age of 5 years sampled from diarrheal episodes and stools

collected by protocol in the absence of diarrheal illness (Fig 1A). Isolate genotypes were compared with all genomes deposited in the pubMLST database (97,012 profiles, data accessed 17<sup>th</sup> February, 2020) and ranked according to how frequently they were found associated with human disease (Fig 1B). Nearly half of the isolates ( $n = 29$ , 47%) were from common lineages, isolated many times before and recorded in pubMLST ( $>50$  MLST profiles; Fig 1B; S7 Table). Symptomatic ( $n = 16$ ; 52% of disease isolates) and asymptomatic ( $n = 12$ ; 43% of carriage isolates) isolates belonged to nine STs (eight CCs), including ST-353 ( $n = 13$ ), ST-45 ( $n = 4$ ), ST-354 ( $n = 3$ ), ST-607 ( $n = 2$ ), ST-460 ( $n = 2$ ), ST-21 (CC21,  $n = 1$ ), ST-50 (CC21,  $n = 1$ ), ST-52 ( $n = 1$ ) and ST-403 ( $n = 1$ ) (S6 Table).

### Proliferation of globally rare genotypes in Peruvian Amazon children

The remaining 33 isolates (53%) belonged to STs that are uncommon in the pubMLST database ( $<50$  MLST profiles; Fig 1B; S7 Table). This suggests that certain lineages that are rare in the UK and the USA may be more common among children in the Peruvian Amazon. Symptomatic ( $n = 15$ ; 48% of disease isolates) and asymptomatic ( $n = 16$ ; 57% of carriage isolates) isolates belonged to 17 STs (15 CCs), including ST-3630 ( $n = 6$ ), ST-1723 ( $n = 5$ ), ST-2993 ( $n = 4$ ), ST-1775 ( $n = 3$ ), ST-2802 ( $n = 2$ ), ST-535 ( $n = 2$ ), ST-362 ( $n = 1$ ), ST-3720 ( $n = 1$ ), ST-407 ( $n = 1$ ), ST-41 ( $n = 1$ ), ST-469 ( $n = 1$ ), ST-1233 ( $n = 1$ ), ST-1365 ( $n = 1$ ), ST-2042 ( $n = 1$ ), ST-2304 ( $n = 1$ ), ST-4053 ( $n = 1$ ) and ST-986 ( $n = 1$ ). Four of these rare STs were represented by three or more isolates: ST-3630 (4 of 6) and ST-2993 (CC362, 4 of 4) were predominantly symptomatic; while ST-1723 (CC354, 4 of 5) and ST-1775 (CC403, 3 of 3) were predominantly asymptomatic (S6 Table).

All *C. jejuni* genomes ( $n = 62$ ) were compared to a global reference dataset representing known genetic diversity within *C. jejuni* ( $n = 164$  isolates from eight countries and three continents) using a maximum-likelihood phylogenetic tree (Fig 1C). Peruvian pediatric isolates did not cluster clearly by geography or disease severity. There was evidence that *C. jejuni* from children in the Peruvian Amazon represented a genetically diverse population. Specifically, there were 26 STs (19 CCs) among the Peruvian isolate collection, with a Simpson's diversity index of 0.904 (95% CI: 0.863–0.946), compared to 50 STs (15 CCs) among the global collection of genomes (Simpson's diversity index = 0.534, 95% CI: 0.453–0.615).

### Peruvian Amazon pediatric isolates have a local gene pool

While there were more STs in the Peruvian collection, there were fewer deep branching lineages compared to the global reference collection (Fig 1D and 1E). This is not surprising as there were fewer samples in total and they came from a specific region and source (children). Discontinuous distribution of pairwise genomic distances in the Peruvian pediatric dataset is indicative of multiple genetically distinct clusters that are diverging in both core sequences and accessory gene content. Visualization of this clustering using the t-distributed stochastic neighbor embedding (t-SNE) projection of accessory distances tightly grouped the Peruvian isolates from the Amazon, while isolates from host generalist lineages in the global reference dataset (absent from the Peru dataset) were more loosely clustered (S1 Fig). This provided evidence of increased horizontal gene transfer (HGT) among Peruvian isolates, compared to global isolate collection.

### Lineages associated with asymptomatic infection in Peruvian Amazon pediatric cases

Asymptomatic isolates and symptomatic isolates represented 17 STs (14 CCs) and 16 STs (14 CCs) respectively. Only 9 STs (8 CCs) contained a mixture of both disease etiologies. Of these

common global STs represented by three or more isolates, only ST-45 was consistently related to the onset of disease symptoms, with 75% of isolates (3 of 4) leading to symptomatic infection (Fig 2A and 2B; S1 Table). Four rare STs: ST-3630 (4 of 6) and ST-2993 (CC362, 4 of 4) were predominantly symptomatic; while ST-1723 (CC354, 4 of 5) and ST-1775 (CC403, 3 of 3) were predominantly asymptomatic (Fig 2A and 2B; S1 Table).

### Regional differences in accessory genome content

There was no difference in the mean genome size between symptomatic and asymptomatic isolates, but significant difference between the Peruvian Amazon pediatric population and the global reference dataset (ANOVA with Tukey's multiple comparisons test,  $p$ -value <0.0001; S1A and S1B Fig). This can partially be explained by a lack of isolates in the Peruvian pediatric collection from host generalist lineages, which tend to have larger genomes (ST-21 and ST-45 CCs; S1A and S1B Fig), consistent with genome reduction being associated with increased host specialization [75,76]. *Campylobacter* has an open pan-genome [35,44,54,77] and the number of genes shared by all isolates decreased as the number of sample genomes in each dataset increased (S2 and S3 Files). The isolate collection from our Peruvian children included a large accessory genome (S4 Table), with a little over half (56%) the genes identified in the genomes of our 62 isolates from Peruvian children considered to be core (1,321 of 2,348 genes present in 95% of isolates). A large proportion of the accessory genome (446 genes, 43% of the 1,027 accessory genes present in between 0 and 95% of isolates) were present in less than 15% of isolates.

Genes that were core in the global reference dataset were also present in the Peruvian pediatric dataset (average prevalence: 97.7%) (S1C Fig; S9 Table). All 29 of the NCTC11168 genes that were absent from Peruvian Amazon isolates (prevalence less than 5%) were found among genomes of isolates in the global reference dataset (average prevalence: 43.0%), with 21 specifically from the lipooligosaccharide (LOS) and capsular polysaccharide (CPS) loci. The LOS and CPS loci are highly variable in gene content [78–81] and this variability is reflected in the diversity of LOS and capsule types for the Peruvian isolates ( $n = 14$  LOS types;  $n = 21$  capsule types; S2 Fig; S6 Table). The most common LOS class locus was class H in 14 strains and 12/14 of these strains were poultry specialists and 10/14 strains were from symptomatic cases. LOS class B was present in 11 strains and only 2/11 were from symptomatic cases. There were four strains with LOS class A and all were from cases with symptomatic etiology and also possessed the HS:41 CPS locus. The most common CPS Penner type was HS:3 ( $n = 10$ ) and 70% of these strains were from symptomatic cases and all ten had LOS class H (S6 Table).

### Poultry is likely the predominant source of infection in Peruvian Amazon children

STs were attributed to a putative host source based on their predominant sampling source in a global collection on pubMLST, supported by probable assignment of host source using STRUCTURE (S7 Table; S3 Fig). Isolates from poultry specialist lineages, including the globally disseminated ST-353, ST-354, ST-607 and ST-460, were the most common source of infection ( $n = 32$ ; Fig 2C, S7 Table). Isolates from rare lineages, scarcely found outside human clinical cases (ST-3630, ST-2993, ST-2802, ST-986, ST-41, ST-362 and ST-2402) elicited the most severe symptoms. Poultry specialist and clinical specialist STs had average community diarrhea severity scores of 1.57 ( $n = 30$ , max: 8) and 2.13 ( $n = 16$ , max: 13), respectively (S3A Fig). No isolates from ruminant-associated lineages caused any disease symptoms in this sample population, however the total number of isolates that putatively were from a ruminant background was small ( $n = 5$ ). Few isolates were isolated from the common generalist STs that dominate clinical



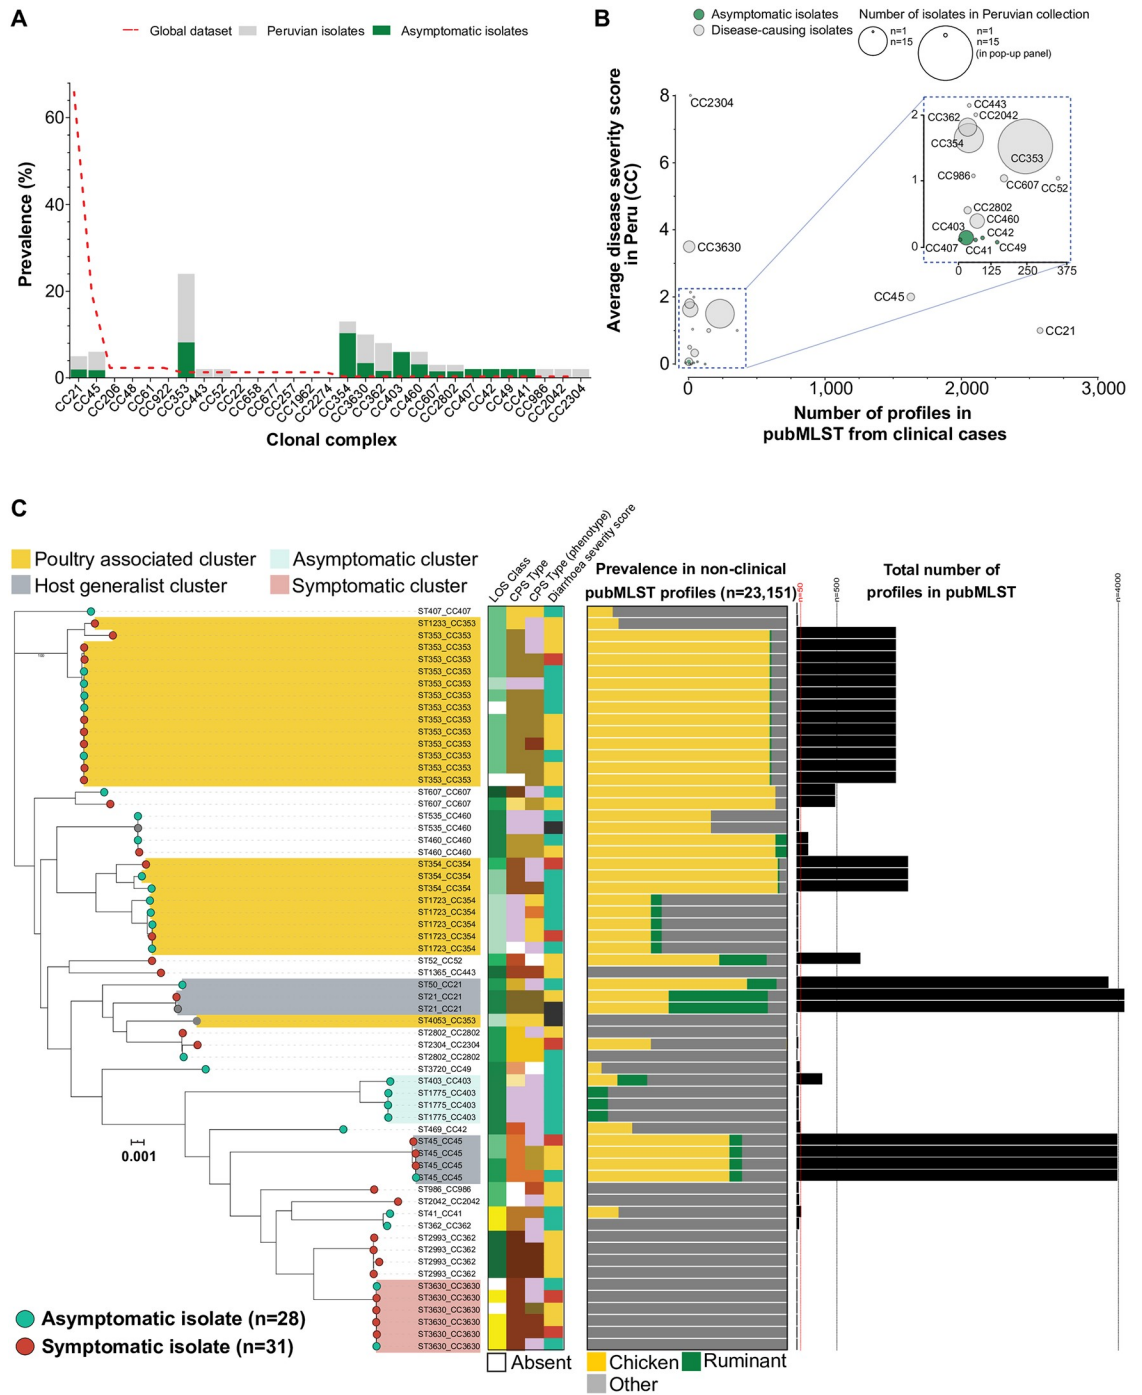

**Fig 2.** (A) Frequency of clonal complexes (CCs) identified among isolates collected from children in the Peruvian Amazon (grey bars) and the global reference dataset (red dotted line). Asymptomatic isolates are colored in green. (B) Average severity score of CCs represented by 3 or more genomes in our local dataset and how often they have previously been sampled from human disease (data from pubMLST; <https://pubmlst.org/>). Circle diameter represents how frequently they were sampled in our Peruvian Amazon pediatric collection. (C) A maximum-likelihood phylogeny was constructed with IQ-TREE, using a GTR model and ultrafast bootstrapping (1,000 bootstraps; version 1.6.8) [55,56] from an alignment of the Peruvian isolates only (n = 62, alignment: 772,794 bp. Scale bar represents genetic distance of 0.001. Leaves from asymptomatic isolates are colored green and symptomatic isolates are red. The tree is annotated with lipooligosaccharide classes, capsular types and disease severity scores. Colored bar charts indicate the frequency with which the corresponding sequence type has been isolated from non-human hosts in pubMLST. Black bars indicate the overall frequency that the corresponding ST profile has been sampled before. Interactive visualization is available on Microreact [57]: <https://microreact.org/project/CampyPeruOnly>.

<https://doi.org/10.1371/journal.pntd.0008533.g002>

collections in developed countries: ST-21 clonal complex (n = 3) and ST-45 clonal complex (n = 4). Quantitative source attribution estimated that 78.4% (n = 5, range 56.5–87.1%) of the *C. jejuni* isolates emerged from chickens based on 5 different probability estimates (S3 Fig).

## Discussion

Diarrhea and malnutrition are major threats to children's health worldwide. However, despite the high incidence of campylobacteriosis and reported differences in disease epidemiology, there is limited understanding of *Campylobacter* in LMICs. By linking sequence data with detailed clinical records from the Peruvian Amazon pediatric cohort study we were able to show that variation in disease presentation was reflected in bacterial genomes, specifically the source and distribution (local and global) of infecting *C. jejuni* strains.

The Peruvian Amazon pediatric isolate collection comprised a diverse assemblage of STs, including common disease-causing lineages and regional STs, that have rarely been sampled in Europe and the USA [47,82]. Globalization of industrialized agriculture has dispersed livestock worldwide [83], broadening the geographical distribution of *C. jejuni*. We found evidence of this pervasive spread with two of the three most common strains isolated in the Peruvian Amazon belonging to the poultry-associated ST-353 and ST-354 complexes [47]. Quantitative source attribution also implicated chicken as the most likely source of infection, consistent with comparable studies in Europe (S3 Fig) [27–29,73,84].

In contrast to the profusion of poultry-associated lineages, there was a striking paucity of host generalist ST-21 and ST-45 clonal complexes [40] that are among the most common disease-causing lineages in Europe and North America. This was also reflected in the core genomes of the both datasets, despite a smaller alignment fewer NCTC11168 (an ST-21CC isolate) genes were identified in the Peru-only dataset. The absence of ST-21 complex isolates has previously been observed in another LMICs, with very few isolates cultured in surveys from Africa, SE Asia and South America [85–89]. Ruminant specialist lineages were also rare among the Peruvian pediatric samples (6.1%) and the most common cattle associated lineage (ST-61 complex [25]) was completely absent. This is clear evidence of different epidemiology in LMICs and potentially suggests different routes to human infection. Few AMR genes were identified in our study (S5 Table), yet analysis of more recent isolates from the same community suggests widespread antibiotic resistance, particularly to macrolides in addition to fluoroquinolones among *C. coli* isolates (not tested here) [41].

Asymptomatic *Campylobacter* carriage represents an alternative epidemiological context to that which has been the basis for most clinical studies [7,90,91]. *C. jejuni* is typically thought to cause transient infection with little opportunity for human-to-human transmission. This means that the human is an evolutionary dead end and the bacterium is unlikely to adapt to the human host. The high prevalence, regular reinfection and prolonged colonization periods in the Peruvian Amazon cohort study (and likely other LMICs) provide greater opportunity for human-to-human spread and adaptation to the host [92,93]. Some studies have attempted to identify signatures of human tropism, or even adaptation [94,95] and it remains possible that the some of the Peruvian STs that are rarely isolated from non-human infections (S7 Table) could provide evidence of human adaptation.

One such candidate for human tropism in the Peruvian Amazon is the ST-403 complex (S7 Table) [76]. None of the four ST-403 isolates we sampled elicited diarrheal symptoms (S1 Table), and according to many interpretations, attenuated virulence is often associated with long-term transmission [96]. This ST has also been sampled from human infections in the Dutch Antilles [97] and is a poor colonizer of avian hosts, typically lacking a gene cluster (*Cj1158-1159-1160*; S1C Fig; S9 Table) [76] known to be important in chicken colonization

[98]. However, not only was this gene cluster common in the Peruvian Amazon pediatric *C. jejuni* data but also there was no clear phylogenetic distinction between symptomatic and asymptomatic isolates, with multiple clonal complexes linked to asymptomatic carriage. While it remains possible that analysis of larger datasets will identify human adapted genomic signatures, our study suggests that host factors, such as cohabitation and poor sanitation, rather than the circulation of asymptomatic lineages, may be responsible for repeated or long-term infection. For instance, several households contributed more than one *C. jejuni* isolate. No overlapping STs were isolated from the same household and individuals who contributed multiple positive samples were seemingly colonized by multiple different *Campylobacter* strains (S1 Table).

While disease severity is not explained by specific lineage associations it remains possible that specific molecular variations mediate virulence in the Peruvian Amazon cohort. The intimate interaction of LOS and CPS with the host immune system means that the underlying genes are a useful target for identifying genomic variation associated with asymptomatic carriage [61,99–101]. Hypervariable genes that are common in the global reference dataset included several from the class C LOS and HS:2 CPS gene clusters (21 of 29 genes), which are absent from  $\geq 95\%$  of the Peruvian Amazon pediatric isolates [62,102]. The LOS locus can be involved in the synthesis of LOS structures that mimic gangliosides, which play a role in the onset of several *Campylobacter* disease sequelae, including post-infectious neuropathies [76–80]. Although, there were no reports of these post-infectious neuropathies in any of these cases, there were 15 Peruvian isolates possessing LOS classes (A or B) that have been shown to be associated with Guillain-Barré and Miller syndromes [103–105]. Among these, all of the strains with LOS class A ( $n = 4$ ) were from symptomatic cases, while only 2 of 11 strains possessing LOS class B were from symptomatic cases. It should be noted that strains possessing LOS class B are not characterized by low virulence with strain 81–176 considered to be a highly virulent *C. jejuni* strain. Similarly, LOS classes that produce non-sialylated LOS also came from cases with differential etiology with 10 of 14 strains possessing class H from symptomatic cases and one of seven class K strains from symptomatic cases (S6 Table).

Peruvian Amazon isolates were likely to have retained the ability to glycosylate flagella through genes contained in the O-linked glycosylation gene cluster (*Cj1293-1342c*), with each gene present in on average 73% (range 33.3–100%) of Peruvian Amazon isolates (S9 Table). Large portions of the CPS gene cluster appear absent from our local Peruvian Amazon isolates (*Cj1421c- Cj1441c*), however the flanking regions involved in capsule assembly and transport are highly conserved in our isolates (*kps* genes; S9 Table)[78–81,106]. These differences are important to characterize and take into account during vaccine development for *Campylobacter*.

In conclusion, by contextualizing *C. jejuni* genomes from Peruvian Amazon children within a global reference collection and linking them to clinical data on varying disease symptoms and severity, we were able to identify local and globally distributed genotypes and determine the likely major source of infection (poultry). Furthermore, we show that common asymptomatic carriage is not the result of a single (or few) human adapted lineages suggesting an important role for host factor in long-term infections. Genomic surveillance integrating microbial ecology with population-based studies in humans and animals has considerable potential for describing cryptic epidemiology and untangling complex disease transmission networks in LMICs where interventions to reduce diarrheal disease are urgently needed.

## Supporting information

**S1 Table. Isolate list and disease severity scores.**  
(XLSX)

**S2 Table. Assembly metrics and accession numbers.**

(XLSX)

**S3 Table. Global reference dataset details.**

(XLSX)

**S4 Table. Reference pan-genome gene presence.**

(XLSX)

**S5 Table. ABRICATE summary.**

(XLSX)

**S6 Table. Genome characterization.**

(XLSX)

**S7 Table. ST summary of pubMSLT.**

(XLSX)

**S8 Table. Source attribution dataset.**

(XLSX)

**S9 Table. Comparison of NCTC11168 gene presence.**

(XLSX)

**S1 Fig.** Genome size comparisons between (A) Asymptomatic (green) and symptomatic (red) Peruvian isolate genomes with the reference dataset (grey); and (B) all sequence types (ST) represented by 3 or more genomes in the dataset. Dotted line indicates the average genome size for all isolates in the dataset (1,646,868 bp). (C) Relative presence of all NCTC 11168 genes ( $n = 1,623$ ) in the Peruvian and reference datasets. Genes core and accessory in the reference dataset are indicated by (x) and (o), respectively. Genes present more often in one dataset compared to the other appear further from the mid-line. (D) Pairwise core and accessory genome distances were compared using PopPunk for the Peruvian genomes and full dataset (version 1.1.4) [70]. Clustering visualized using the t-distributed stochastic neighbor embedding (t-SNE) projection of accessory distances in microreact.

(TIF)

**S2 Fig.** Number of (A) antimicrobial resistance genes (ARGs), (B) virulence genes and (C) predicted plasmids per isolate estimated using ABRICATE (version 0.9.8; [69]). (D) Maximum-likelihood phylogeny of the Peruvian isolates only. The tree is annotated with disease severity scores, the onset of specific symptoms (hematochezia and fever), presence of AMR genes (beta-lactams, tetracyclines or aminoglycosides), identified plasmids and sialylation prediction.

(TIF)

**S3 Fig.** Average disease severity score by (A) isolate host ecology and (B) sequence type (represented by 3 or more isolates). (C) Representative source attribution of Peruvian pediatric isolates using the Bayesian clustering algorithm STRUCTURE (version v2.3.4, [71]). Each isolate is represented by a vertical bar colored by the estimated probability that it originated from putative source reservoirs (yellow: chicken; green: ruminant; black: wild bird and grey: other). (D) Summary box plots of predicted attribution of 62 Peruvian pediatric isolates following 5 independent estimations.

(TIF)

**S1 File. Pan-genome.**

(FASTA)

**S2 File. Alignment—Peru isolates only.**  
(FAS)

**S3 File. Alignment—Peru plus context isolates.**  
(ZIP)

## Author Contributions

**Conceptualization:** Ben Pascoe, Samuel K. Sheppard.

**Data curation:** Ben Pascoe, Francesca Schiaffino, Rosa Burga, Pablo Peñataro Yori, Keith A. Jolley, Maribel Paredes Olortegui, Margaret N. Kosek.

**Formal analysis:** Ben Pascoe, Francesca Schiaffino, Susan Murray, Guillaume Méric, Sion C. Bayliss, Evangelos Mourkas, Jessica K. Calland, Kerry K. Cooper, Craig T. Parker, Margaret N. Kosek.

**Funding acquisition:** Margaret N. Kosek, Samuel K. Sheppard.

**Investigation:** Ben Pascoe, Francesca Schiaffino, Guillaume Méric, Evangelos Mourkas, Jessica K. Calland, Craig T. Parker, Margaret N. Kosek, Samuel K. Sheppard.

**Methodology:** Ben Pascoe, Susan Murray, Sion C. Bayliss, Matthew D. Hitchings.

**Project administration:** Margaret N. Kosek, Samuel K. Sheppard.

**Resources:** Ben Pascoe, Matthew D. Hitchings, Rosa Burga, Pablo Peñataro Yori, Keith A. Jolley, Maribel Paredes Olortegui.

**Supervision:** Margaret N. Kosek, Samuel K. Sheppard.

**Visualization:** Ben Pascoe, Guillaume Méric.

**Writing – original draft:** Ben Pascoe, Craig T. Parker, Margaret N. Kosek, Samuel K. Sheppard.

**Writing – review & editing:** Ben Pascoe, Francesca Schiaffino, Guillaume Méric, Kerry K. Cooper, Craig T. Parker, Margaret N. Kosek, Samuel K. Sheppard.

## References

1. World Health Organization. Communicable Diseases Cluster. Removing obstacles to healthy development: report on infectious diseases. [Internet]. World Health Organization; 1999. <https://apps.who.int/iris/handle/10665/65847>
2. Högberg U. The World Health Report 2005: “Make every mother and child count”—including Africans. *Scandinavian Journal of Public Health*. Scand J Public Health; 2005. pp. 409–411.
3. Amour C, Gratz J, Mduma E, Svensen E, Rogawski ET, McGrath M, et al. Epidemiology and Impact of *Campylobacter* Infection in Children in 8 Low-Resource Settings: Results From the MAL-ED Study. *Clin Infect Dis*. 2016; 63: 1171–1179. <https://doi.org/10.1093/cid/ciw542> PMID: 27501842
4. Sheppard SK, Dallas JF, Strachan NJC, MacRae M, McCarthy ND, Wilson DJ, et al. *Campylobacter* genotyping to determine the source of human infection. *Clin Infect Dis*. 2009; 48: 1072–1078. <https://doi.org/10.1086/597402> PMID: 19275496
5. Nichols GL, Richardson JF, Sheppard SK, Lane C, Sarran C. *Campylobacter* epidemiology: a descriptive study reviewing 1 million cases in England and Wales between 1989 and 2011. *BMJ Open*. 2012; 2: e001179. <https://doi.org/10.1136/bmjopen-2012-001179> PMID: 22798256
6. Martin PMV, Mathiot J, Ipero J, Georges AJ, Georges-Courbot MC. Antibody response to *Campylobacter coli* in children during intestinal infection and carriage. *J Clin Microbiol*. 1988; 26: 1421–1424. <https://doi.org/10.1128/JCM.26.7.1421-1424.1988> PMID: 3410956



7. Lee G, Pan W, Penataro Yori P, Paredes Olortegui M, Tilley D, Gregory M, et al. Symptomatic and Asymptomatic *Campylobacter* Infections Associated with Reduced Growth in Peruvian Children. *PLoS Negl Trop Dis*. 2013; 7. <https://doi.org/10.1371/journal.pntd.0002036> PMID: 23383356
8. Liu J, Platts-Mills JA, Juma J, Kabir F, Nkeze J, Okoi C, et al. Use of quantitative molecular diagnostic methods to identify causes of diarrhoea in children: a reanalysis of the GEMS case-control study. *Lancet*. 2016; 388: 1291–1301. [https://doi.org/10.1016/S0140-6736\(16\)31529-X](https://doi.org/10.1016/S0140-6736(16)31529-X) PMID: 27673470
9. Lanata CF, Fischer-Walker CL, Olascoaga AC, Torres CX, Aryee MJ, Black RE. Global Causes of Diarrheal Disease Mortality in Children <5 Years of Age: A Systematic Review. *PLoS One*. 2013; 8. <https://doi.org/10.1371/journal.pone.0072788> PMID: 24023773
10. Kaakoush NO, Castaño-Rodríguez N, Mitchell HM, Man SM. Global epidemiology of *campylobacter* infection. *Clin Microbiol Rev*. 2015; 28: 687–720. <https://doi.org/10.1128/CMR.00006-15> PMID: 26062576
11. Coker AO, Isokpehi RD, Thomas BN, Amisu KO, Larry Obi C. Human campylobacteriosis in developing countries. *Emerging Infectious Diseases*. Centers for Disease Control and Prevention (CDC); 2002. pp. 237–243. <https://doi.org/10.3201/eid0803.010233> PMID: 11927019
12. Reed RP, Friedland IR, Wegerhoff FO, Khoosal M. *Campylobacter* bacteremia in children. *Pediatr Infect Dis J*. 1996; 15: 345–348. <https://doi.org/10.1097/00006454-199604000-00012> PMID: 8866805
13. Platts-Mills JA, Babji S, Bodhidatta L, Gratz J, Haque R, Havt A, et al. Pathogen-specific burdens of community diarrhoea in developing countries: A multisite birth cohort study (MAL-ED). *Lancet Glob Heal*. 2015; 3: e564–e575. [https://doi.org/10.1016/S2214-109X\(15\)00151-5](https://doi.org/10.1016/S2214-109X(15)00151-5) PMID: 26202075
14. Miller M, Acosta AM, Chavez CB, Flores JT, Olotegui MP, Pinedo SR, et al. The MAL-ED study: A multinational and multidisciplinary approach to understand the relationship between enteric pathogens, malnutrition, gut physiology, physical growth, cognitive development, and immune responses in infants and children up to 2 years of age in resource-poor environments. *Clin Infect Dis*. 2014; 59: S193–S206. <https://doi.org/10.1093/cid/ciu653> PMID: 25305287
15. Kotloff KL, Nasrin D, Blackwelder WC, Wu Y, Farag T, Panchalingham S, et al. The incidence, aetiology, and adverse clinical consequences of less severe diarrhoeal episodes among infants and children residing in low-income and middle-income countries: a 12-month case-control study as a follow-on to the Global Enteric Multicenter Study (GEMS). *Lancet Glob Heal*. 2019; 7: e568–e584. [https://doi.org/10.1016/S2214-109X\(19\)30076-2](https://doi.org/10.1016/S2214-109X(19)30076-2) PMID: 31000128
16. Kotloff KL, Nataro JP, Blackwelder WC, Nasrin D, Farag TH, Panchalingam S, et al. Burden and aetiology of diarrhoeal disease in infants and young children in developing countries (the Global Enteric Multicenter Study, GEMS): A prospective, case-control study. *Lancet*. 2013; 382: 209–222. [https://doi.org/10.1016/S0140-6736\(13\)60844-2](https://doi.org/10.1016/S0140-6736(13)60844-2) PMID: 23680352
17. Pazzaglia G, Bourgeois aL, el Diwany K, Nour N, Badran N, Hablas R. *Campylobacter* diarrhoea and an association of recent disease with asymptomatic shedding in Egyptian children. *Epidemiol Infect*. 1991; 106: 77–82. <https://doi.org/10.1017/s0950268800056466> PMID: 1993455
18. Georges-Courbot MC, Beraud-Cassel AM, Gouandjika I, Georges AJ. Prospective study of enteric *Campylobacter* infections in children from birth to 6 months in the Central African Republic. *J Clin Microbiol*. 1987; 25: 836–839. <https://doi.org/10.1128/JCM.25.5.836-839.1987> PMID: 3584419
19. Figueroa G, Galeno H, Troncoso M, Toledo S, Soto V. Prospective study of *Campylobacter jejuni* infection in Chilean infants evaluated by culture and serology. *J Clin Microbiol*. 1989; 27: 1040–1044. <https://doi.org/10.1128/JCM.27.5.1040-1044.1989> PMID: 2473090
20. Ani EA, Takahashi T, Shonekan RAO. *Campylobacter jejuni* antibodies in Nigerian children. *J Clin Microbiol*. 1988; 26: 605–606. <https://doi.org/10.1128/JCM.26.3.605-606.1988> PMID: 3356797
21. Calva J, Lopez-Vidal A, Ruiz-Palacios G, Ramos A, Bojalil R. Cohort study of intestinal infection with *Campylobacter* in Mexican children. *Lancet*. 1988; 331: 503–506. [https://doi.org/10.1016/S0140-6736\(88\)91297-4](https://doi.org/10.1016/S0140-6736(88)91297-4)
22. Rao MR, Naficy AB, Savarino SJ, Abu-Elyazeed R, Wierzbica TF, Peruski LF, et al. Pathogenicity and convalescent excretion of *Campylobacter* in rural Egyptian children. *Am J Epidemiol*. 2001; 154: 166–173. <https://doi.org/10.1093/aje/154.2.166> PMID: 11447051
23. Poocharoen L, Bruin CW, Sirisanthana V, Vannareumol P, Leechanachai P, Sukhavat K. The relative importance of various enteropathogens as a cause of diarrhoea in hospitalized children in Chiang Mai, Thailand. *J Diarrhoeal Dis Res*. 1986; 4: 10–15. PMID: 3794260
24. Sheppard SK, Guttman DS, Fitzgerald JR. Population genomics of bacterial host adaptation. *Nat Rev Genet*. 2018; 19: 549–565. <https://doi.org/10.1038/s41576-018-0032-z> PMID: 29973680
25. Mourkas E, Taylor AJA, Méric G, Bayliss SCS, Pascoe B, Mageiros L, et al. Agricultural intensification and the evolution of host specialism in the enteric pathogen *Campylobacter jejuni*. *Proc Natl Acad Sci*. 2020; 117 (20) 11018–11028 <https://doi.org/10.1073/pnas.1917168117> PMID: 32366649

26. Sheppard SK, Cheng L, Méric G, De Haan CPA, Llarena AK, Marttinen P, et al. Cryptic ecology among host generalist *Campylobacter jejuni* in domestic animals. *Mol Ecol*. 2014; <https://doi.org/10.1111/mec.12742> PMID: 24689900
27. Sheppard SK, Colles F, Richardson J, Cody AJ, Elson R, Lawson A, et al. Host association of *Campylobacter* genotypes transcends geographic variation. *Appl Environ Microbiol*. 2010; 76: 5269–77. <https://doi.org/10.1128/AEM.00124-10> PMID: 20525862
28. Thépault A, Méric G, Rivoal K, Pascoe B, Mageiros L, Touzain F, et al. Genome-wide identification of host-segregating epidemiological markers for source attribution in *Campylobacter jejuni*. *Appl Environ Microbiol*. 2017; 83. <https://doi.org/10.1128/AEM.03085-16> PMID: 28115376
29. Sheppard SK, Dallas JF, MacRae M, McCarthy ND, Sproston EL, Gormley FJ, et al. *Campylobacter* genotypes from food animals, environmental sources and clinical disease in Scotland 2005/6. *Int J Food Microbiol*. 2009; 134: 96–103. <https://doi.org/10.1016/j.ijfoodmicro.2009.02.010> PMID: 19269051
30. Revez J, Rossi M, Ellström P, de Haan C, Rautelin H, Hänninen M-L. Finnish *Campylobacter jejuni* Strains of Multilocus Sequence Type ST-22 Complex Have Two Lineages with Different Characteristics. Bereswill S, editor. *PLoS One*. 2011; 6: e26880. <https://doi.org/10.1371/journal.pone.0026880> PMID: 22039552
31. Heikema AP, Islam Z, Horst-Kreft D, Huizinga R, Jacobs BC, Wagenaar JA, et al. *Campylobacter jejuni* capsular genotypes are related to Guillain-Barré syndrome. *Clin Microbiol Infect*. 2015; 21. <https://doi.org/10.1016/j.cmi.2015.05.031> PMID: 26070960
32. Nielsen LNN, Sheppard SK, McCarthy NDD, Maiden MCJCJ, Ingmer H, Krogfelt KAA. MLST clustering of *Campylobacter jejuni* isolates from patients with gastroenteritis, reactive arthritis and Guillain-Barre syndrome. *J Appl Microbiol*. 2010; 108: 591–599. <https://doi.org/10.1111/j.1365-2672.2009.04444.x> PMID: 19702866
33. Unicomb LE, O'Reilly LC, Kirk MD, Stafford RJ, Smith H V., Becker NG, et al. Risk factors for infection with *Campylobacter jejuni flaA* genotypes. *Epidemiol Infect*. 2008; 136: 1480–1491. <https://doi.org/10.1017/S0950268807000246> PMID: 18205975
34. Sahin O, Fitzgerald C, Stroika S, Zhao S, Sippy RJ, Kwan P, et al. Molecular evidence for zoonotic transmission of an emergent, highly pathogenic *Campylobacter jejuni* clone in the United States. *J Clin Microbiol*. 2012; 50: 680–7. <https://doi.org/10.1128/JCM.06167-11> PMID: 22189122
35. Kirk KF, Méric G, Nielsen HL, Pascoe B, Sheppard SK, Thorlacius-Ussing O, et al. Molecular epidemiology and comparative genomics of *Campylobacter concisus* strains from saliva, faeces and gut mucosal biopsies in inflammatory bowel disease. *Sci Rep*. 2018; 8. <https://doi.org/10.1038/s41598-018-20135-4> PMID: 29382867
36. Pascoe B, Méric G, Yahara K, Wimalarathna H, Murray S, Hitchings MD, et al. Local genes for local bacteria: Evidence of allopatry in the genomes of transatlantic *Campylobacter* populations. *Mol Ecol*. 2017; 26: 4497–4508. <https://doi.org/10.1111/mec.14176> PMID: 28493321
37. de Haan CPA, Kivisto R, Hakkinen M, Rautelin H, Hanninen ML. Decreasing Trend of Overlapping Multilocus Sequence Types between Human and Chicken *Campylobacter jejuni* Isolates over a Decade in Finland. *Appl Environ Microbiol*. 2010; 76: 5228–5236. <https://doi.org/10.1128/AEM.00581-10> PMID: 20543048
38. Asakura H, Brüggemann H, Sheppard SK, Ekawa T, Meyer TF, Yamamoto S, et al. Molecular Evidence for the Thriving of *Campylobacter jejuni* ST-4526 in Japan. Bereswill S, editor. *PLoS One*. 2012; 7: e48394. <https://doi.org/10.1371/journal.pone.0048394> PMID: 23144873
39. Llarena AK, Zhang J, Vehkala M, Välimäki N, Hakkinen M, Hänninen ML, et al. Monomorphic genotypes within a generalist lineage of *Campylobacter jejuni* show signs of global dispersion. *Microb genomics*. 2016; 2: e000088. <https://doi.org/10.1099/mgen.0.000088> PMID: 28348829
40. Méric G, McNally A, Pessia A, Mourkas E, Pascoe B, Mageiros L, et al. Convergent Amino Acid Signatures in Polyphyletic *Campylobacter jejuni* Subpopulations Suggest Human Niche Tropism. *Genome Biol Evol*. 2018; 10: 763–774. <https://doi.org/10.1093/gbe/evy026> PMID: 29452359
41. Schiaffino F, Colston JM, Paredes-Olortegui M, François R, Pisanic N, Burga R, et al. Antibiotic resistance of *Campylobacter* species in a pediatric cohort study. *Antimicrob Agents Chemother*. 2019; 63. <https://doi.org/10.1128/AAC.01911-18> PMID: 30420482
42. Rojas JD, Reynolds ND, Pike BL, Espinoza NM, Kuroiwa J, Jani V, et al. Distribution of Capsular Types of *Campylobacter jejuni* Isolates from Symptomatic and Asymptomatic Children in Peru. *Am J Trop Med Hyg*. 2019; 101: 541–548. <https://doi.org/10.4269/ajtmh.18-0994> PMID: 31392944
43. Zerbino DR, Birney E. Velvet: Algorithms for *de novo* short read assembly using de Bruijn graphs. *Genome Res*. 2008; <https://doi.org/10.1101/gr.074492.107> PMID: 18349386
44. Pascoe B, Méric G, Murray S, Yahara K, Mageiros L, Bowen R, et al. Enhanced biofilm formation and multi-host transmission evolve from divergent genetic backgrounds in *Campylobacter jejuni*. *Environ Microbiol*. 2015; 17: 4779–4789. <https://doi.org/10.1111/1462-2920.13051> PMID: 26373338

45. Sheppard SK, Didelot X, Méric G, Torralbo A, Jolley KA, Kelly DJ, et al. Genome-wide association study identifies vitamin B5 biosynthesis as a host specificity factor in *Campylobacter*. *Proc Natl Acad Sci*. 2013; 110: 11923–11927. <https://doi.org/10.1073/pnas.1305559110> PMID: 23818615
46. Yahara K, Méric G, Taylor AJ, de Vries SPW, Murray S, Pascoe B, et al. Genome-wide association of functional traits linked with *Campylobacter jejuni* survival from farm to fork. *Environ Microbiol*. 2017; 19. <https://doi.org/10.1111/1462-2920.13628> PMID: 27883255
47. Cody AJ, McCarthy NM, Wimalaratna HL, Colles FM, Clark L, Bowler ICJWJW, et al. A Longitudinal 6-Year Study of the Molecular Epidemiology of Clinical *Campylobacter* Isolates in Oxfordshire, United Kingdom. *J Clin Microbiol*. 2012; 50: 3193–3201. <https://doi.org/10.1128/JCM.01086-12> PMID: 22814466
48. Lee G, Yori PP, Olortegui MP, Caulfield LE, Sack DA, Fischer-Walker C, et al. An instrument for the assessment of diarrhoeal severity based on a longitudinal community-based study. *BMJ Open*. 2014; 4. <https://doi.org/10.1136/bmjopen-2014-004816> PMID: 24907244
49. Aziz RK, Bartels D, Best AA, DeJongh M, Disz T, Edwards RA, et al. The RAST Server: rapid annotations using subsystems technology. *BMC Genomics*. 2008; 9: 75. <https://doi.org/10.1186/1471-2164-9-75> PMID: 18261238
50. Overbeek R, Olson R, Pusch GD, Olsen GJ, Davis JJ, Disz T, et al. The SEED and the Rapid Annotation of microbial genomes using Subsystems Technology (RAST). *Nucleic Acids Res*. 2014; 42: D206–14. <https://doi.org/10.1093/nar/gkt1226> PMID: 24293654
51. Méric G, Yahara K, Mageiros L, Pascoe B, Maiden MCJ, Jolley KA, et al. A reference pan-genome approach to comparative bacterial genomics: Identification of novel epidemiological markers in pathogenic *Campylobacter*. *PLoS One*. 2014; 9. <https://doi.org/10.1371/journal.pone.0092798> PMID: 24676150
52. Katoh K, Standley DM. MAFFT Multiple Sequence Alignment Software Version 7: Improvements in Performance and Usability. *Mol Biol Evol*. 2013; 30: 772–780. <https://doi.org/10.1093/molbev/mst010> PMID: 23329690
53. Sheppard SK, Jolley KA, Maiden MCJ. A gene-by-gene approach to bacterial population genomics: Whole genome MLST of *Campylobacter*. *Genes (Basel)*. 2012; 3: 261–277. <https://doi.org/10.3390/genes3020261> PMID: 24704917
54. Méric G, Yahara K, Mageiros L, Pascoe B, Maiden MCJ, Jolley KA, et al. A reference pan-genome approach to comparative bacterial genomics: Identification of novel epidemiological markers in pathogenic *Campylobacter*. *PLoS One*. 2014; 9. <https://doi.org/10.1371/journal.pone.0092798> PMID: 24676150
55. Nguyen L-T, Schmidt HA, von Haeseler A, Minh BQ. IQ-TREE: A Fast and Effective Stochastic Algorithm for Estimating Maximum-Likelihood Phylogenies. *Mol Biol Evol*. 2015; 32: 268–274. <https://doi.org/10.1093/molbev/msu300> PMID: 25371430
56. Hoang DT, Chernomor O, von Haeseler A, Minh BQ, Vinh LS. UFBoot2: Improving the Ultrafast Bootstrap Approximation. *Mol Biol Evol*. 2018; 35: 518–522. <https://doi.org/10.1093/molbev/msx281> PMID: 29077904
57. Argimón S, Abudahab K, Goater RJE, Fedosejev A, Bhai J, Glasner C, et al. Microreact: visualizing and sharing data for genomic epidemiology and phylogeography. *Microb genomics*. 2016; 2: e000093. <https://doi.org/10.1099/mgen.0.000093> PMID: 28348833
58. Jolley KA, Bray JE, Maiden MCJ. Open-access bacterial population genomics: BIGSdb software, the PubMLST.org website and their applications [version 1; referees: 2 approved]. *Wellcome Open Res*. 2018; 3. <https://doi.org/10.12688/wellcomeopenres.14826.1> PMID: 30345391
59. Jolley KA, Maiden MCJ. BIGSdb: Scalable analysis of bacterial genome variation at the population level. *BMC Bioinformatics*. 2010; 11: 595. <https://doi.org/10.1186/1471-2105-11-595> PMID: 21143983
60. Dingle KE, Colles FM, Falush D, Maiden MCJ. Sequence typing and comparison of population biology of *Campylobacter coli* and *Campylobacter jejuni*. *J Clin Microbiol*. 2005; 43: 340–347. <https://doi.org/10.1128/JCM.43.1.340-347.2005> PMID: 15634992
61. Parker CT, Gilbert M, Yuki N, Endtz HP, Mandrell RE. Characterization of lipooligosaccharide-biosynthetic loci of *Campylobacter jejuni* reveals new lipooligosaccharide classes: Evidence of mosaic organizations. *J Bacteriol*. 2008; 190: 5681–5689. <https://doi.org/10.1128/JB.00254-08> PMID: 18556784
62. Culebro A, Revez J, Pascoe B, Friedmann Y, Hitchings MDMD, Stupak J, et al. Large sequence diversity within the biosynthesis locus and common biochemical features of *Campylobacter coli* lipooligosaccharides. DiRita VJ, editor. *J Bacteriol*. 2016; 198: 2829–40. <https://doi.org/10.1128/JB.00347-16> PMID: 27481928
63. Grundmann H, Hori S, Tanner G. Determining confidence intervals when measuring genetic diversity and the discriminatory abilities of typing methods for microorganisms. *J Clin Microbiol*. 2001; 39: 4190–4192. <https://doi.org/10.1128/JCM.39.11.4190-4192.2001> PMID: 11682558

64. Carattoli A, Zankari E, Garcíá-Fernández A, Larsen MV, Lund O, Villa L, et al. In Silico detection and typing of plasmids using plasmidfinder and plasmid multilocus sequence typing. *Antimicrob Agents Chemother*. 2014; 58: 3895–3903. <https://doi.org/10.1128/AAC.02412-14> PMID: 24777092
65. Chen L, Zheng D, Liu B, Yang J, Jin Q. VFDB 2016: Hierarchical and refined dataset for big data analysis—10 years on. *Nucleic Acids Res*. 2016; 44: D694–D697. <https://doi.org/10.1093/nar/gkv1239> PMID: 26578559
66. Feldgarden M, Brover V, Haft DH, Prasad AB, Slotta DJ, Tolstoy I, et al. Using the NCBI AMRFinder Tool to Determine Antimicrobial Resistance Genotype-Phenotype Correlations Within a Collection of NARMS Isolates. *bioRxiv*. 2019; 550707. <https://doi.org/10.1101/550707>
67. Zankari E, Hasman H, Cosentino S, Vestergaard M, Rasmussen S, Lund O, et al. Identification of acquired antimicrobial resistance genes. *J Antimicrob Chemother*. 2012; 67: 2640–2644. <https://doi.org/10.1093/jac/dks261> PMID: 22782487
68. Alcock BP, Raphenya AR, Lau TTY, Tsang KK, Bouchard M, Edalatmand A, et al. CARD 2020: antibiotic resistance surveillance with the comprehensive antibiotic resistance database. *Nucleic Acids Res*. 2019; <https://doi.org/10.1093/nar/gkz935> PMID: 31665441
69. Seemann T. ABRicate: Mass screening of contigs for antimicrobial and virulence genes [Internet]. GitHub repository. 2018. <https://github.com/tseemann/abricate>
70. Lees JA, Harris SR, Tonkin-Hill G, Gladstone RA, Lo SW, Weiser JN, et al. Fast and flexible bacterial genomic epidemiology with PopPUNK. *Genome Res*. 2019; 29: 304–316. <https://doi.org/10.1101/gr.241455.118> PMID: 30679308
71. Pritchard JK, Stephens M, Donnelly P. Inference of population structure using multilocus genotype data. *Genetics*. 2000;
72. Dearlove BL, Cody AJ, Pascoe B, Méric G, Wilson DJ, Sheppard SK. Rapid host switching in generalist *Campylobacter* strains erodes the signal for tracing human infections. *ISME J*. 2016; 10. <https://doi.org/10.1038/ismej.2015.149> PMID: 26305157
73. Cody AJ, Maiden MC, Strachan NJ, McCarthy ND. A systematic review of source attribution of human campylobacteriosis using multilocus sequence typing. *Eurosurveillance*. 2019; 24. <https://doi.org/10.2807/1560-7917.ES.2019.24.43.1800696> PMID: 31662159
74. Baily JL, Méric G, Bayliss S, Foster G, Moss SE, Watson E, et al. Evidence of land-sea transfer of the zoonotic pathogen *Campylobacter* to a wildlife marine sentinel species. *Mol Ecol*. 2015; 24. <https://doi.org/10.1111/mec.13001> PMID: 25401947
75. Weinert LA, Chaudhuri RR, Wang J, Peters SE, Corander J, Jombart T, et al. Genomic signatures of human and animal disease in the zoonotic pathogen *Streptococcus suis*. *Nat Commun*. 2015; 6: 6740. <https://doi.org/10.1038/ncomms7740> PMID: 25824154
76. Morley L, McNally A, Paszkiewicz K, Corander J, Méric G, Sheppard SK, et al. Gene loss and lineage-specific restriction-modification systems associated with niche differentiation in the *Campylobacter jejuni* sequence type 403 clonal complex. *Appl Environ Microbiol*. 2015; <https://doi.org/10.1128/AEM.00546-15> PMID: 25795671
77. McInerney JO, McNally A, O'Connell MJ. Why prokaryotes have pangenomes [Internet]. *Nature Microbiology*. Nature Publishing Group; 2017. pp. 1–5. <https://doi.org/10.1038/nmicrobiol.2017.40> PMID: 28350002
78. Karlyshev A V., Champion OL, Churcher C, Brisson JR, Jarrell HC, Gilbert M, et al. Analysis of *Campylobacter jejuni* capsular loci reveals multiple mechanisms for the generation of structural diversity and the ability to form complex heptoses. *Mol Microbiol*. 2005; 55: 90–103. <https://doi.org/10.1111/j.1365-2958.2004.04374.x> PMID: 15612919
79. Parker CT, Gilbert M, Yuki N, Endtz HP, Mandrell RE. Characterization of lipooligosaccharide-biosynthetic loci of *Campylobacter jejuni* reveals new lipooligosaccharide classes: Evidence of mosaic organizations. *J Bacteriol*. 2008; 190: 5681–5689. <https://doi.org/10.1128/JB.00254-08> PMID: 18556784
80. Parker CT, Horn ST, Gilbert M, Miller WG, Woodward DL, Mandrell RE. Comparison of *Campylobacter jejuni* lipooligosaccharide biosynthesis loci from a variety of sources. *J Clin Microbiol*. 2005; 43: 2771–2781. <https://doi.org/10.1128/JCM.43.6.2771-2781.2005> PMID: 15956396
81. Poly F, Serichantalergs O, Kuroiwa J, Pootong P, Mason C, Guerry P, et al. Updated *Campylobacter jejuni* Capsule PCR Multiplex Typing System and Its Application to Clinical Isolates from South and Southeast Asia. Skurnik M, editor. *PLoS One*. 2015; 10: e0144349. <https://doi.org/10.1371/journal.pone.0144349> PMID: 26630669
82. Dunn SJ, Pascoe B, Turton J, Fleming V, Diggle M, Sheppard SK, et al. Genomic epidemiology of clinical *Campylobacter* spp. at a single health trust site. *Microb Genomics*. 2018; <https://doi.org/10.1099/mgen.0.000227> PMID: 30307843



83. Mottet A, Tempio G. Global poultry production: Current state and future outlook and challenges. *World's Poultry Science Journal*. Cambridge University Press; 2017. pp. 245–256. <https://doi.org/10.1017/S0043933917000071>
84. Wilson DJ, Gabriel E, Leatherbarrow AJH, Cheesbrough J, Gee S, Bolton E, et al. Tracing the Source of Campylobacteriosis. Guttman DS, editor. *PLoS Genet*. 2008; 4: e1000203. <https://doi.org/10.1371/journal.pgen.1000203> PMID: 18818764
85. Prachantasena S, Charununtakorn P, Muangnoicharoen S, Hankla L, Techawal N, Chaveerach P, et al. Distribution and genetic profiles of *Campylobacter* in commercial broiler production from breeder to slaughter in Thailand. *PLoS One*. 2016; 11. <https://doi.org/10.1371/journal.pone.0149585> PMID: 26886590
86. Ngulukun S, Oboegbulem S, Klein G. Multilocus sequence typing of *Campylobacter jejuni* and *Campylobacter coli* isolates from poultry, cattle and humans in Nigeria. *J Appl Microbiol*. 2016; 121: 561–568. <https://doi.org/10.1111/jam.13185> PMID: 27206561
87. Duong VT, Tuyen HT, Van Minh P, Campbell JI, Le Phuc H, Nhu TDH, et al. No Clinical benefit of empirical antimicrobial therapy for pediatric diarrhea in a high-usage, high-resistance setting. *Clin Infect Dis*. 2018; 66: 504–511. <https://doi.org/10.1093/cid/cix844> PMID: 29029149
88. Mason J, Iturriza-Gomara M, O'Brien SJ, Ngwira BM, Dove W, Maiden MCJ, et al. *Campylobacter* Infection in Children in Malawi Is Common and Is Frequently Associated with Enteric Virus Co-Infections. Hold GL, editor. *PLoS One*. 2013; 8: e59663. <https://doi.org/10.1371/journal.pone.0059663> PMID: 23555739
89. de Vries SPW, Vurayai M, Holmes M, Gupta S, Bateman M, Goldfarb D, et al. Phylogenetic analyses and antimicrobial resistance profiles of *Campylobacter* spp. from diarrhoeal patients and chickens in Botswana. Chang Y-F, editor. *PLoS One*. 2018; 13: e0194481. <https://doi.org/10.1371/journal.pone.0194481> PMID: 29561903
90. Acheson D, Allos BM. *Campylobacter jejuni* Infections: Update on Emerging Issues and Trends. *Clin Infect Dis*. 2001; 32: 1201–1206. <https://doi.org/10.1086/319760> PMID: 11283810
91. Toledo Z, Simaluiza RJ, Astudillo X, Fernández H. Occurrence and antimicrobial susceptibility of thermophilic *Campylobacter* species isolated from healthy children attending municipal care centers in Southern Ecuador. *Rev Inst Med Trop Sao Paulo*. 2017; 59.
92. Didelot X, Walker AS, Peto TE, Crook DW, Wilson DJ. Within-host evolution of bacterial pathogens. *Nature Reviews Microbiology*. Nature Publishing Group; 2016. pp. 150–162. <https://doi.org/10.1038/nrmicro.2015.13> PMID: 26806595
93. Martins NE, Faria VG, Teixeira L, Magalhães S, Sucena É. Host Adaptation Is Contingent upon the Infection Route Taken by Pathogens. *PLoS Pathog*. 2013;9. <https://doi.org/10.1371/journal.ppat.1003601> PMID: 24086131
94. Buchanan CJ, Webb AL, Mutschall SK, Kruczkiewicz P, Barker DOR, Hetman BM, et al. A genome-wide association study to identify diagnostic markers for human pathogenic *Campylobacter jejuni* strains. *Front Microbiol*. 2017; <https://doi.org/10.3389/fmicb.2017.01224> PMID: 28713351
95. Thépault A, Rose V, Quesne S, Poezevara T, Béven V, Hirschaud E, et al. Ruminant and chicken: Important sources of campylobacteriosis in France despite a variation of source attribution in 2009 and 2015. *Sci Rep*. 2018;
96. Cressler CE, McLeod D V., Rozins C, Van Den Hoogen J, Day T. The adaptive evolution of virulence: A review of theoretical predictions and empirical tests. *Parasitology*. Cambridge University Press; 2016. pp. 915–930.
97. Duim B, Godschalk PCR, Van Den Braak N, Dingle KE, Dijkstra JR, Leyde E, et al. Molecular Evidence for Dissemination of Unique *Campylobacter jejuni* Clones in Curaçao, Netherlands Antilles. *J Clin Microbiol*. 2003; 41: 5593–5597. <https://doi.org/10.1128/jcm.41.12.5593-5597.2003> PMID: 14662946
98. Taveirne ME, Theriot CM, Livny J, DiRita VJ. The Complete *Campylobacter jejuni* Transcriptome during Colonization of a Natural Host Determined by RNAseq. *PLoS One*. 2013; 8. <https://doi.org/10.1371/journal.pone.0073586> PMID: 23991199
99. Guerry P, Ewing CP, Hickey TE, Prendergast MM, Moran AP. Sialylation of lipooligosaccharide cores affects immunogenicity and serum resistance of *Campylobacter jejuni*. *Infect Immun*. 2000; 68: 6656–62. <http://www.ncbi.nlm.nih.gov/pubmed/11083778> PMID: 11083778
100. Zebian N, Merx-Jacques A, Pittock PP, Houle S, Dozois CM, Lajoie GA, et al. Comprehensive analysis of flagellin glycosylation in *Campylobacter jejuni* NCTC 11168 reveals incorporation of legionaminic acid and its importance for host colonization. *Glycobiology*. 2016; 26: 386–397. <https://doi.org/10.1093/glycob/cwv104> PMID: 26582606
101. Guerry P, Ewing CP, Hickey TE, Prendergast MM, Moran AP. Sialylation of lipooligosaccharide cores affects immunogenicity and serum resistance of *Campylobacter jejuni*. *Infect Immun*. 2000; 68: 6656–62. <https://doi.org/10.1128/iai.68.12.6656-6662.2000> PMID: 11083778



102. Pascoe B, Williams LK, Calland JK, Meric G, Hitchings MD, Dyer M, et al. Domestication of *Campylobacter jejuni* NCTC 11168. *Microb genomics*. 2019; 5. <https://doi.org/10.1099/mgen.0.000279> PMID: 31310201
103. Gilbert M, Karwaski MF, Bernatchez S, Young NM, Taboada E, Michniewicz J, et al. The genetic bases for the variation in the lipo-oligosaccharide of the mucosal pathogen, *Campylobacter jejuni*. Biosynthesis of sialylated ganglioside mimics in the core oligosaccharide. *J Biol Chem*. 2002; 277: 327–337. <https://doi.org/10.1074/jbc.M108452200> PMID: 11689567
104. Houliston RS, Vinogradov E, Dzieciatkowska M, Li J, St Michael F, Karwaski MF, et al. Lipooligosaccharide of *Campylobacter jejuni*: Similarity with multiple types of mammalian glycans beyond gangliosides. *J Biol Chem*. 2011; 286: 12361–12370. <https://doi.org/10.1074/jbc.M110.181750> PMID: 21257763
105. Godschalk PCR, Kuijff ML, Li J, St. Michael F, Ang CW, Jacobs BC, et al. Structural characterization of *Campylobacter jejuni* lipooligosaccharide outer cores associated with Guillain-Barré and Miller Fisher syndromes. *Infect Immun*. 2007; 75: 1245–1254. <https://doi.org/10.1128/IAI.00872-06> PMID: 17261613
106. Guerry P, Poly F, Riddle M, Maue AC, Chen Y-H, Monteiro MA, et al. *Campylobacter* polysaccharide capsules: virulence and vaccines. *Cellular and Infection Microbiology*. 2012; <https://doi.org/10.3389/fcimb.2012.00007> PMID: 22919599
