# Supplementary material for: Genomic epidemiology of Campylobacter jejuni associated with asymptomatic pediatric infection in the Peruvian Amazon
Source: PLoS Negl Trop Dis. 2020 Aug 10;14(8):e0008533. doi: 10.1371/journal.pntd.0008533 (PMC7440661; doi:10.1371/journal.pntd.0008533)
Supplement: S6 Table — (XLSX) [file pntd.0008533.s006.xlsx]

## Sheet: Table S6
Supplementary table S6: Genome characterization
	Database_ID	Study name	Aetiology	ST	Clonal Complex	pubMLST Ecology	LOS Class	CPS/Penner type	Sialylated	ARGs	BETA-LACTAM	TETRACYCLINE	Aminoglycoside	MDR	Plasmidfinder	VfDb
	3042	SHI000499	Asymptomatic	ST407	CC407	Poultry specialist	H	15		0	0	0	0	0	0	114
	3044	SHI000897	Symptomatic	ST2802	CC2802	Clinical	C	10	1	2	1	1	0	0	0	106
	3045	SHI001589	Symptomatic	ST1723	CC354	Poultry specialist	K	1,44		0	0	0	0	0	0	111
	3046	SHI001963	Asymptomatic	ST1723	CC354	Poultry specialist	K			0	0	0	0	0	0	111
	3047	SHI002010	Asymptomatic	ST1723	CC354	Poultry specialist	K	1,44		0	0	0	0	0	0	110
	3048	SHI002130	Asymptomatic	ST460	CC460	Poultry specialist	B	4	1	0	0	0	0	0	0	117
	3050	SHI003140	Symptomatic	ST460	CC460	Poultry specialist	B	4	1	0	0	0	0	0	0	114
	3051	SHI003399	Asymptomatic	ST1775	CC403	Ruminant specialist	B	23,36	1	1	0	1	0	0	1	122
	3054	SHI004548	Symptomatic	ST353	CC353	Poultry specialist	H	3		1	1	0	0	0	0	111
	3055	SHI004559	Symptomatic	ST52	CC52	Generalist	F	31		1	1	0	0	0	0	109
	3056	SHI005318	Symptomatic	ST353	CC353	Poultry specialist	H	3		1	1	0	0	0	0	113
	3057	SHI005682	Symptomatic	ST353	CC353	Poultry specialist	H	3		1	1	0	0	0	0	111
	3058	SHI005788	Symptomatic	ST45	CC45	Generalist	T	21		1	1	0	0	0	0	95
	3059	SHI005837	Symptomatic	ST353	CC353	Poultry specialist	H	3		1	1	0	0	0	0	114
	3060	SHI006035	Symptomatic	ST353	CC353	Poultry specialist	H	3		1	1	0	0	0	0	114
	3061	SHI006117	Asymptomatic	ST45	CC45	Generalist	T	21		1	1	0	0	0	0	96
	3062	SHI006346	Asymptomatic	ST41	CC41	Clinical	new	55		1	1	0	0	0	0	98
	3063	SHI006659	Asymptomatic	ST353	CC353	Poultry specialist	H	3		1	1	0	0	0	0	114
	3064	SHI006827	Symptomatic	ST45	CC45	Generalist	H	21		1	1	0	0	0	0	95
	3065	SHI006881	Symptomatic	ST45	CC45	Generalist	H	21		1	1	0	0	0	0	93
	3066	SHI007069	Asymptomatic	ST403	CC403	Ruminant specialist	B	17	1	0	0	0	0	0	0	115
	3067	SHI007075	Symptomatic	ST353	CC353	Poultry specialist	H	3		1	1	0	0	0	0	113
	3068	SHI007183	Symptomatic	ST21	CC21	Generalist	B	2	1	1	1	0	0	0	0	130
	3069	SHI007227	Unknown	ST21	CC21	Generalist	B2	2	1	2	1	1	0	0	0	135
	3071	SHI007457	Symptomatic	ST3630	CC362	Clinical	new	40		0	0	0	0	0	0	100
	3078	SHI009672	Symptomatic	ST2993	CC362	Clinical	A	41	1	0	0	0	0	0	0	101
	3079	SHI009788	Symptomatic	ST2304	CC2304	Poultry specialist	C	10	1	2	1	1	0	0	0	120
	3080	SHI009858	Symptomatic	ST354	CC354	Poultry specialist	F	53		1	1	0	0	0	0	98
	3081	SHI009962	Asymptomatic	ST1775	CC403	Ruminant specialist	B2	23,36	1	1	0	1	0	0	1	118
	3084	SHI010578	Asymptomatic	ST50	CC21	Generalist	C	8		1	1	0	0	0	0	111
	3086	SHI010756	Asymptomatic	ST353	CC353	Poultry specialist	H	3		1	1	0	0	0	0	114
	3087	SHI010781	Asymptomatic	ST353	CC353	Poultry specialist	K	1,44		1	1	0	0	0	0	114
	3088	SHI010802	Asymptomatic	ST469	CC42	Ruminant specialist	B	29	1	0	0	0	0	0	0	105
	3090	SHI003157	Symptomatic	ST2993	CC362	Clinical	A	41	1	0	0	0	0	0	0	104
	3091	SHI011308	Asymptomatic	ST354	CC354	Poultry specialist	J	53		1	1	0	0	0	0	100
	3092	SHI003929	Asymptomatic	ST535	CC460	Poultry specialist	B	4/16/50	1	0	0	0	0	0	0	114
	3094	SHI003134	Symptomatic	ST2993	CC362	Clinical	A	41	1	0	0	0	0	0	0	97
	3096	SHI002729	Asymptomatic	ST2802	CC2802	Clinical	C	10	1	2	1	1	0	0	0	120
	3098	SHI008768	Unknown	ST535	CC460	Poultry specialist	B	4/16/50	1	0	0	0	0	0	0	106
	3311	SHI000038	Asymptomatic	ST1723	CC354	Poultry specialist	K	1,44		0	0	0	0	0	0	128
	3312	SHI000343	Asymptomatic	ST1723	CC354	Poultry specialist	K	1,44		1	1	0	0	0	0	126
	3313	SHI000525	Asymptomatic	ST354	CC354	Poultry specialist	J	53		0	0	0	0	0	0	115
	3314	SHI002280	Asymptomatic	ST607	CC607	Poultry specialist	O	43		0	0	0	0	0	0	125
	3316	SHI003846	Unknown	ST4053	CC353	Poultry specialist	K	15		2	1	1	0	0	1	107
	3318	SHI004185	Asymptomatic	ST353	CC353	Poultry specialist	H	3		1	1	0	0	0	0	121
	3320	SHI004444	Symptomatic	ST1233	CC353	Poultry specialist	H	15		1	0	1	0	0	0	123
	3322	SHI004648	Symptomatic	ST2993	CC362	Clinical	A	41	1	0	0	0	0	0	0	123
	3324	SHI004921	Symptomatic	ST2042	CC2042	Clinical	G			1	1	0	0	0	0	111
	3329	SHI006313	Asymptomatic	ST353	CC353	Poultry specialist	H	3		1	1	0	0	0	0	132
	3331	SHI006364	Symptomatic	ST353	CC353	Poultry specialist				1	1	0	0	0	0	114
	3332	SHI006951	Asymptomatic	ST3630	CC362	Clinical	new	40		0	0	0	0	0	0	104
	3334	SHI007122	Asymptomatic	ST3720	CC49	Generalist	S	18		1	1	0	0	0	0	119
	3335	SHI007163	Symptomatic	ST986	CC986	Clinical	G			2	1	1	0	0	0	110
	3336	SHI007225	Symptomatic	ST3630	CC362	Clinical	new	40		0	0	0	0	0	0	98
	3338	SHI007495	Symptomatic	ST3630	CC362	Clinical	new	40		0	0	0	0	0	0	109
	3339	SHI007571	Symptomatic	ST3630	CC362	Clinical	new	40		0	0	0	0	0	0	104
	3340	SHI007675	Asymptomatic	ST6841	CC362	Clinical	new	55		1	1	0	0	0	0	105
	3341	SHI008510	Asymptomatic	ST1775	CC403	Ruminant specialist	B	23,36	1	1	0	1	0	0	1	124
	3342	SHI009035	Asymptomatic	ST3630	CC362	Clinical	new	40		0	0	0	0	0	0	103
	3343	SHI009495	Symptomatic	ST607	CC607	Poultry specialist	C	16	1	0	0	0	0	0	0	125
	3349	SHI010586	Symptomatic	ST353	CC353	Poultry specialist	H	3		1	0	1	0	0	0	121
	3351	SHI011347	Symptomatic	ST1365	CC443	Poultry specialist	P	37		0	0	0	0	0	0	122
