# Supplementary material for: Genomic epidemiology of Campylobacter jejuni associated with asymptomatic pediatric infection in the Peruvian Amazon
Source: PLoS Negl Trop Dis. 2020 Aug 10;14(8):e0008533. doi: 10.1371/journal.pntd.0008533 (PMC7440661; doi:10.1371/journal.pntd.0008533)
Supplement: S7 Table — (XLSX) [file pntd.0008533.s007.xlsx]

## Sheet: Sheet1
Supplementary table S8: frequency of Peruvian pediatric isolates in pubMLST
pubMLST profiles: 97,012
Accessed: 17.02.2020
	isolate	Label	ST	(n=)	Rare	CC	Clinical	Chicken	Ruminant	Wild bird	Other animal
	3042_SS_1566	ST407_CC407	407	9	*	CC407	0.777778	0.111111	0	0	0
	3044_SS_1569	ST2802_CC2802	2802	7	*	CC2802	1	0	0	0	0
	3045_SS_1570	ST1723_CC354	1723	19	*	CC354	0.631579	0.315789	0.0526316	0	0
	3046_SS_1571	ST1723_CC354	1723	19	*	CC354	0.631579	0.315789	0.0526316	0	0
	3047_SS_1572	ST1723_CC354	1723	19	*	CC354	0.631579	0.315789	0.0526316	0	0
	3048_SS_1573	ST460_CC460	460	143	0	CC460	0.307692	0.104895	0.00699301	0	0
	3050_SS_1577	ST460_CC460	460	143	0	CC460	0.307692	0.104895	0.00699301	0	0
	3051_SS_1578	ST1775_CC403	1775	23	*	CC403	0.521739	0	0.0434783	0	0.304348
	3054_SS_1585	ST353_CC353	353	1230	0	CC353	0.204065	0.0943089	0.000813008	0.000813008	0.00650407
	3055_SS_1587	ST52_CC52	52	790	0	CC52	0.451899	0.116456	0.0417722	0	0.0177215
	3056_SS_1591	ST353_CC353	353	1230	0	CC353	0.204065	0.0943089	0.000813008	0.000813008	0.00650407
	3057_SS_1592	ST353_CC353	353	1230	0	CC353	0.204065	0.0943089	0.000813008	0.000813008	0.00650407
	3058_SS_1593	ST45_CC45	45	3982	0	CC45	0.410095	0.269463	0.0243596	0.0163235	0.0223506
	3059_SS_1594	ST353_CC353	353	1230	0	CC353	0.204065	0.0943089	0.000813008	0.000813008	0.00650407
	3060_SS_1597	ST353_CC353	353	1230	0	CC353	0.204065	0.0943089	0.000813008	0.000813008	0.00650407
	3061_SS_1599	ST45_CC45	45	3982	0	CC45	0.410095	0.269463	0.0243596	0.0163235	0.0223506
	3062_SS_1601	ST41_CC41	41	56	0	CC41	0.357143	0.0535714	0	0	0.0178571
	3063_SS_1603	ST353_CC353	353	1230	0	CC353	0.204065	0.0943089	0.000813008	0.000813008	0.00650407
	3064_SS_1604	ST45_CC45	45	3982	0	CC45	0.410095	0.269463	0.0243596	0.0163235	0.0223506
	3065_SS_1605	ST45_CC45	45	3982	0	CC45	0.410095	0.269463	0.0243596	0.0163235	0.0223506
	3066_SS_1608	ST403_CC403	403	317	0	CC403	0.659306	0.0126183	0.0126183	0	0.0473186
	3067_SS_1609	ST353_CC353	353	1230	0	CC353	0.204065	0.0943089	0.000813008	0.000813008	0.00650407
	3068_SS_1612	ST21_CC21	21	4071	0	CC21	0.633014	0.0803242	0.100221	0.0012282	0.0073692
	3069_SS_1613	ST21_CC21	21	4071	0	CC21	0.633014	0.0803242	0.100221	0.0012282	0.0073692
	3071_SS_1616	ST3630_CC3630	3630	6	*	CC3630	0.666667	0	0	0	0
	3078_SS_1630	ST2993_CC362	2993	8	*	CC362	0.875	0	0	0	0
	3079_SS_1631	ST2304_CC2304	2304	19	*	CC2304	0.526316	0.315789	0	0	0.157895
	3080_SS_1632	ST354_CC354	354	1380	0	CC354	0.665217	0.188406	0.00144928	0.000724638	0.00362319
	3081_SS_1633	ST1775_CC403	1775	23	*	CC403	0.521739	0	0.0434783	0	0.304348
	3084_SS_1644	ST50_CC21	50	3874	0	CC21	0.542075	0.193598	0.0366546	0.00129066	0.00671141
	3086_SS_1647	ST353_CC353	353	1230	0	CC353	0.204065	0.0943089	0.000813008	0.000813008	0.00650407
	3087_SS_1648	ST353_CC353	353	1230	0	CC353	0.204065	0.0943089	0.000813008	0.000813008	0.00650407
	3088_SS_1649	ST469_CC42	469	42	*	CC42	0.333333	0.0952381	0	0	0
	3090_SS_1653	ST2993_CC362	2993	8	*	CC362	0.875	0	0	0	0
	3091_SS_1654	ST354_CC354	354	1380	0	CC354	0.665217	0.188406	0.00144928	0.000724638	0.00362319
	3092_SS_1657	ST535_CC460	535	28	*	CC460	0.321429	0.642857	0	0	0
	3094_SS_1660	ST2993_CC362	2993	8	*	CC362	0.875	0	0	0	0
	3096_SS_1663	ST2802_CC2802	2802	7	*	CC2802	1	0	0	0	0
	3098_SS_1667	ST535_CC460	535	28	*	CC460	0.321429	0.642857	0	0	0
	3311_SHI000038	ST1723_CC354	1723	19	*	CC354	0.631579	0.315789	0.0526316	0	0
	3312_SHI000343	ST1723_CC354	1723	19	*	CC354	0.631579	0.315789	0.0526316	0	0
	3313_SHI000525	ST354_CC354	354	1380	0	CC354	0.665217	0.188406	0.00144928	0.000724638	0.00362319
	3314_SHI002280	ST607_CC607	607	475	0	CC607	0.309474	0.332632	0	0	0.0105263
	3316_SHI003846	ST4053_CC353	4053	7	*	CC353	0.571429	0	0	0	0
	3318_SHI004185	ST353_CC353	353	1230	0	CC353	0.204065	0.0943089	0.000813008	0.000813008	0.00650407
	3320_SHI004444	ST1233_CC353	1233	15	*	CC353	0.733333	0.133333	0	0	0.0666667
	3322_SHI004648	ST2993_CC362	2993	8	*	CC362	0.875	0	0	0	0
	3324_SHI004921	ST2042_CC2042	2042	31	*	CC2042	0.612903	0	0	0	0.0645161
	3329_SHI006313	ST353_CC353	353	1230	0	CC353	0.204065	0.0943089	0.000813008	0.000813008	0.00650407
	3331_SHI006364	ST353_CC353	353	1230	0	CC353	0.204065	0.0943089	0.000813008	0.000813008	0.00650407
	3332_SHI006951	ST3630_CC3630	3630	6	*	CC3630	0.666667	0	0	0	0
	3334_SHI007122	ST3720_CC49	3720	36	*	CC49	0.666667	0.0555556	0	0	0
	3335_SHI007163	ST986_CC986	986	24	*	CC986	0.875	0	0	0	0
	3336_SH007225	ST3630_CC3630	3630	6	*	CC3630	0.666667	0	0	0	0
	3338_SHI007495	ST3630_CC3630	3630	6	*	CC3630	0.666667	0	0	0	0
	3339_SHI007571	ST3630_CC3630	3630	6	*	CC3630	0.666667	0	0	0	0
	3340_SHI007675	ST362_CC362	362	28	*	CC362	0.821429	0	0	0	0
	3341_SHI008510	ST1775_CC403	1775	23	*	CC403	0.521739	0	0.0434783	0	0.304348
	3342_SHI009035	ST3630_CC3630	3630	6	*	CC3630	0.666667	0	0	0	0
	3343_SHI009495	ST607_CC607	607	475	0	CC607	0.309474	0.332632	0	0	0.0105263
	3349_SHI010586	ST353_CC353	353	1230	0	CC353	0.204065	0.0943089	0.000813008	0.000813008	0.00650407
	3351_SHI011347	ST1365_CC443	1365	13	*	CC443	0.769231	0.230769	0	0	0
